# Supplementary material for: No effect of selected engineered nanomaterials on reproduction and survival of the springtail Folsomia candida
Source: Royal Society of Chemistry journal article supplement (doi:10.1039/c7en00824d), 2018-01-01
Supplement: c7en00824d1.pdf [file c7en00824d1.pdf]

## Supporting Information

### No effect of selected engineered nanomaterials on reproduction and survival of the springtail *Folsomia candida*

Jeroen W. Noordhoek<sup>1</sup>, Rudo A. Verweij<sup>1</sup>, Cornelis A.M. van Gestel<sup>1</sup>, Nico M. van Straalen<sup>1</sup>, Dick Roelofs<sup>1</sup>

<sup>1</sup>Department of Ecological Science, Vrije Universiteit, De Boelelaan 1085, 1081 HV Amsterdam, The Netherlands

#### Corresponding Author

<sup>1</sup>Jeroen W. Noordhoek: +31 20 59 82618, e-mail: jeroen.noordhoek@vu.nl, address: Department of Ecological Science, Vrije Universiteit, De Boelelaan 1085, 1081 HV Amsterdam, The Netherlands.

Number of pages: 11

Number of tables: 13

Number of figures: 1

## Table of Contents

### List of tables

|                                                                                                                                                                                                                                                                                                                                                    |     |
|----------------------------------------------------------------------------------------------------------------------------------------------------------------------------------------------------------------------------------------------------------------------------------------------------------------------------------------------------|-----|
| Table S1. Average cobalt concentration ( $\pm$ SD, n=3) measured in Lufa 2.2 soil spiked with WCCo nanomaterial (NM). .....                                                                                                                                                                                                                        | S4  |
| Table S2. Average cobalt concentration ( $\pm$ SD, n=3) measured in Lufa 2.2 soil spiked with $\text{CoCl}_2$ . .....                                                                                                                                                                                                                              | S5  |
| Table S3. Average copper concentration ( $\pm$ SD, n=3) measured in Lufa 2.2 soil spiked with CuO nanomaterial (NM) and $\text{CuCl}_2$ .....                                                                                                                                                                                                      | S6  |
| Table S4. Average iron concentration ( $\pm$ SD, n=3) measured in Lufa 2.2 soil spiked with $\text{Fe}_2\text{O}_3$ NM and $\text{FeCl}_3$ . .....                                                                                                                                                                                                 | S7  |
| Table S5. $\text{pH}_{\text{CaCl}_2}$ of Lufa 2.2 soil freshly spiked with WCCo nanomaterial (NM), iron oxide nanomaterial ( $\text{Fe}_2\text{O}_3$ -NM), copper oxide nanomaterial (CuO-NM), organic pigment red, Irgazin® nanomaterial (OP-NM) and multi-walled carbon nanotubes (MWCNT) (T = 0) and after 28 days (T = 28) equilibration. .... | S8  |
| Table S6. $\text{pH}_{\text{CaCl}_2}$ of Lufa 2.2 soil freshly spiked with iron chloride ( $\text{FeCl}_3$ ) and copper chloride ( $\text{CuCl}_2$ ) (T = 0) and after 28 days (T = 28) equilibration.....                                                                                                                                         | S8  |
| Table S7. $\text{pH}_{\text{CaCl}_2}$ of Lufa 2.2 soil freshly spiked with $\text{CoCl}_2$ (T = 0) and after 28 days (T = 28) equilibration.. .....                                                                                                                                                                                                | S9  |
| Table S8. Cobalt concentrations (n=3) measured in the pore water of Lufa 2.2 soil spiked with WCCo nanomaterial (NM) expressed as mg Co/l, at start (T=0 days) and end (T=28 days) of test. ....                                                                                                                                                   | S9  |
| Table S9. Cobalt concentrations (n=3) measured in the pore water of Lufa 2.2 soil spiked with $\text{CoCl}_2$ expressed as mg Co/l, at start (T=0 days) and end (T=28 days) of test. ....                                                                                                                                                          | S10 |
| Table S10. Iron concentrations (n=3) measured in the pore water of Lufa 2.2 soil spiked with $\text{Fe}_2\text{O}_3$ NM expressed as mg Fe/l, at start (T=0 days) and end (T=28 days) of test. ....                                                                                                                                                | S10 |
| Table S11. Iron concentrations (n=3) measured in the pore water of Lufa 2.2 soil spiked with $\text{FeCl}_3$ expressed as mg Fe/l, at start (T=0 days) and end (T=28 days) of test. ....                                                                                                                                                           | S11 |
| Table S12. Copper concentrations (n=3) measured in the pore water of Lufa 2.2 soil spiked with CuO nanomaterial (NM) expressed as mg Cu/l, at start (T=0 days) and end (T=28 days) of test. ....                                                                                                                                                   | S11 |
| Table S13. Copper concentrations (n=3) measured in the pore water of Lufa 2.2 soil spiked with $\text{CuCl}_2$ expressed as mg Cu/l, at start (T=0 days) and end (T=28 days) of test. ....                                                                                                                                                         | S12 |

**List of figures**

Figure S1. Picture of a snapfrozen (with liquid nitrogen) *Folsomia candida* after 28 days of exposure to organic pigment (OP) nanomaterials. The picture shows that the compound is present in the animal's gut. Picture taken by Jeroen Noordhoek. .... S13

**Table S1.** Average cobalt concentration ( $\pm$ SD, n=3) measured in Lufa 2.2 soil spiked with WCCo nanomaterial (NM). Note that WCCo NM contains on average 7% cobalt (measured).

| Nominal<br>(mg WCCo/kg dry<br>soil) | Expected maximum Co<br>concentration (12% of WCCo, according to<br>manufacturer) (mg Co/kg dry soil) | Measured Co<br>concentration<br>(mg Co/kg dry soil) |
|-------------------------------------|------------------------------------------------------------------------------------------------------|-----------------------------------------------------|
| 0                                   |                                                                                                      | 0.83 $\pm$ 0.14                                     |
| 200                                 | 24                                                                                                   | 18.5 $\pm$ 1.73                                     |
| 400                                 | 48                                                                                                   | 31.3 $\pm$ 2.37                                     |
| 800                                 | 96                                                                                                   | 60.5 $\pm$ 4.50                                     |
| 1600                                | 192                                                                                                  | 108 $\pm$ 3.38                                      |
| 3200                                | 384                                                                                                  | 222 $\pm$ 11.0                                      |
| 6400                                | 768                                                                                                  | 395 $\pm$ 17.1                                      |

**Table S2.** Average cobalt concentration ( $\pm$ SD, n=3) measured in Lufa 2.2 soil spiked with CoCl<sub>2</sub>. Recoveries (%) are presented in between brackets.

| Nominal (mg Co/kg dry soil) | Measured (mg Co/kg dry soil) |
|-----------------------------|------------------------------|
| 0                           | 1.46 $\pm$ 0.05              |
| 62.5                        | 61.6 $\pm$ 5.67 (99%)        |
| 125                         | 122 $\pm$ 0.98 (98%)         |
| 250                         | 242 $\pm$ 10.3 (97%)         |
| 500                         | 526 $\pm$ 11.4 (105%)        |
| 1000                        | 1038 $\pm$ 40.8 (104%)       |

**Table S3.** Average copper concentration ( $\pm$ SD, n=3) measured in Lufa 2.2 soil spiked with CuO nanomaterial (NM) and CuCl<sub>2</sub>. Recoveries (%) are presented in between brackets.

| Nominal<br>(mg Cu/kg dry<br>soil) | Measured (mg Cu/kg dry soil)            |                                          |
|-----------------------------------|-----------------------------------------|------------------------------------------|
|                                   | CuO NM                                  | CuCl <sub>2</sub>                        |
| <b>0</b>                          | 4.45 $\pm$ 0.35                         | <b>4.73 <math>\pm</math> 0.21</b>        |
| <b>100</b>                        |                                         | <b>111 <math>\pm</math> 1.18 (111%)</b>  |
| <b>200</b>                        | 195 $\pm$ 8.08 (97%)                    | <b>244 <math>\pm</math> 2.44 (122%)</b>  |
| <b>400</b>                        | 351 $\pm$ 8.08 (88%)                    | <b>521 <math>\pm</math> 5.96 (130%)</b>  |
| <b>800</b>                        | 742 $\pm$ 25.5 (93%)                    | <b>898 <math>\pm</math> 5.05 (112%)</b>  |
| <b>1600</b>                       | 1439 $\pm$ 22.3 (90%)                   | <b>1690 <math>\pm</math> 7.02 (106%)</b> |
| <b>3200</b>                       | 3147 $\pm$ 94.8 (98%)                   |                                          |
| <b>6400</b>                       | <b>6286 <math>\pm</math> 36.6 (98%)</b> |                                          |

**Table S4.** Average iron concentration ( $\pm$ SD, n=3) measured in Lufa 2.2 soil spiked with Fe<sub>2</sub>O<sub>3</sub> NM and FeCl<sub>3</sub>. Recoveries (%) are presented in between brackets.

| Nominal<br>(mg Fe/kg dry<br>soil) | Measured (mg Fe/kg dry soil)      |                                                               |                   |                                            |
|-----------------------------------|-----------------------------------|---------------------------------------------------------------|-------------------|--------------------------------------------|
|                                   | Fe <sub>2</sub> O <sub>3</sub> NM | Fe <sub>2</sub> O <sub>3</sub> NM<br>corrected for<br>control | FeCl <sub>3</sub> | FeCl <sub>3</sub> corrected for<br>control |
| <b>0</b>                          | 3591 $\pm$ 127                    |                                                               | 3526 $\pm$ 208    |                                            |
| <b>100</b>                        |                                   |                                                               | 3617 $\pm$ 65.9   | <b>92 (92%)</b>                            |
| <b>200</b>                        | 3829 $\pm$ 33.9                   | 239 (119%)                                                    | 3767 $\pm$ 48.1   | <b>241 (121%)</b>                          |
| <b>400</b>                        | 3976 $\pm$ 96.3                   | 386 (96%)                                                     | 3956 $\pm$ 94.9   | <b>430 (108%)</b>                          |
| <b>800</b>                        | 4363 $\pm$ 186                    | 773 (97%)                                                     | 4305 $\pm$ 491    | <b>779 (97%)</b>                           |
| <b>1600</b>                       | 4957 $\pm$ 276                    | 1367 (85%)                                                    | 5109 $\pm$ 38.3   | <b>1584 (99%)</b>                          |
| <b>3200</b>                       | 6311 $\pm$ 219                    | 2720 (85%)                                                    |                   |                                            |
| <b>6400</b>                       | <b>9151 <math>\pm</math> 51.6</b> | <b>5560 (87%)</b>                                             |                   |                                            |

**Table S5.** pH<sub>CaCl2</sub> of Lufa 2.2 soil freshly spiked with WCCo nanomaterial (NM), iron oxide nanomaterial (Fe<sub>2</sub>O<sub>3</sub>-NM), copper oxide nanomaterial (CuO-NM), organic pigment red, Irgazin® nanomaterial (OP-NM) and multi-walled carbon nanotubes (MWCNT) (T = 0) and after 28 days (T = 28) equilibration. pH values are the average of three replicates.

| Nominal<br>(mg /kg dry soil) | WCCo-NM             |                     | Fe <sub>2</sub> O <sub>3</sub> -NM |                     | CuO-NM              |                     | OP-NM               |                     | MWCNT               |                     |
|------------------------------|---------------------|---------------------|------------------------------------|---------------------|---------------------|---------------------|---------------------|---------------------|---------------------|---------------------|
|                              | pH <sub>CaCl2</sub> | pH <sub>CaCl2</sub> | pH <sub>CaCl2</sub>                | pH <sub>CaCl2</sub> | pH <sub>CaCl2</sub> | pH <sub>CaCl2</sub> | pH <sub>CaCl2</sub> | pH <sub>CaCl2</sub> | pH <sub>CaCl2</sub> | pH <sub>CaCl2</sub> |
|                              | T = 0               | T = 28              | T = 0                              | T = 28              | T = 0               | T = 28              | T = 0               | T = 28              | T = 0               | T = 28              |
| Control                      | 6.27                | 5.65                | 6.22                               | 5.67                | 6.37                | 5.76                | 6.36                | 5.70                | 6.35                | 5.80                |
| 200                          | 6.32                | 5.67                | 6.22                               | 5.62                | 6.34                | 5.92                | 6.36                | 5.69                | 6.35                | 5.76                |
| 400                          | 6.36                | 5.65                | 6.21                               | 5.68                | 6.35                | 5.90                | 6.38                | 5.70                | 6.35                | 5.76                |
| 800                          | 6.40                | 5.71                | 6.21                               | 5.67                | 6.35                | 5.97                | 6.37                | 5.76                | 6.35                | 5.70                |
| 1600                         | 6.48                | 5.86                | 6.21                               | 5.65                | 6.36                | 6.17                | 6.38                | 5.76                | 6.36                | 5.79                |
| 3200                         | 6.55                | 5.90                | 6.23                               | 5.65                | 6.37                | 6.31                | 6.36                | 5.75                | 6.37                | 5.78                |
| 6400                         | 6.60                | 6.17                | 6.22                               | 5.62                | 6.36                | 6.35                | 6.34                | 5.88                | 6.37                | 5.91                |

**Table S6.** pH<sub>CaCl2</sub> of Lufa 2.2 soil freshly spiked with iron chloride (FeCl<sub>3</sub>) and copper chloride (CuCl<sub>2</sub>) (T = 0) and after 28 days (T = 28) equilibration. pH values are the average of three replicates.

| Nominal<br>(mg /kg dry soil) | FeCl <sub>3</sub>   |                     | CuCl <sub>2</sub>   |                     |
|------------------------------|---------------------|---------------------|---------------------|---------------------|
|                              | pH <sub>CaCl2</sub> | pH <sub>CaCl2</sub> | pH <sub>CaCl2</sub> | pH <sub>CaCl2</sub> |
|                              | T = 0               | T = 28              | T = 0               | T = 28              |
| Control                      | 6.21                | 5.71                | 6.27                | 5.71                |
| 100                          | 5.99                | 5.48                | 6.15                | 5.68                |
| 200                          | 5.78                | 5.54                | 6.08                | 5.67                |
| 400                          | 5.42                | 5.48                | 6.24                | 5.76                |
| 800                          | 4.54                | 4.75                | 5.88                | 6.03                |
| 1600                         | 3.41                | 3.51                | 5.56                | 5.71                |



**Table S7.** pH<sub>CaCl2</sub> of Lufa 2.2 soil freshly spiked with CoCl<sub>2</sub> (T = 0) and after 28 days (T = 28) equilibration. pH values are the average of three replicates.

| Nominal<br>(mg Co/kg dry soil) | pH <sub>CaCl2</sub> |        |
|--------------------------------|---------------------|--------|
|                                | T = 0               | T = 28 |
| Control                        | 5.99                | 5.75   |
| 62.5                           | 5.93                | 5.72   |
| 125                            | 5.84                | 5.81   |
| 250                            | 5.90                | 5.86   |
| 500                            | 5.87                | 5.99   |
| 1000                           | 5.74                | 5.98   |

**Table S8.** Cobalt concentrations (n=3) measured in the pore water of Lufa 2.2 soil spiked with WCCo nanomaterial (NM) expressed as mg Co/l, at start (T=0 days) and end (T=28 days) of test. Detection limit = 0.003.

| Nominal<br>(mg WCCo/kg dry soil) | mg Co/l |        |
|----------------------------------|---------|--------|
|                                  | T = 0   | T = 28 |
| Control                          | 0.001   | 0.001  |
| 3200                             | 3.29    | 1.20   |
| 6400                             | 3.88    | 1.88   |

**Table S9.** Cobalt concentrations (n=3) measured in the pore water of Lufa 2.2 soil spiked with CoCl<sub>2</sub> expressed as mg Co/l, at start (T=0 days) and end (T=28 days) of test. Detection limit = 0.003.

| Nominal<br>(mg Co/kg dry soil) | mg Co/l |        |
|--------------------------------|---------|--------|
|                                | T = 0   | T = 28 |
| Control                        | -0.001  | -0.002 |
| 250                            | 7.70    | 15.5   |
| 500                            | 44.2    | 58.6   |
| 1000                           | 366     | 332    |

**Table S10.** Iron concentrations (n=3) measured in the pore water of Lufa 2.2 soil spiked with Fe<sub>2</sub>O<sub>3</sub> NM expressed as mg Fe/l, at start (T=0 days) and end (T=28 days) of test. Detection limit = 0.012.

| Nominal<br>(mg Fe/kg dry soil) | mg Fe/l |        |
|--------------------------------|---------|--------|
|                                | T = 0   | T = 28 |
| Control                        | 0.14    | 0.06   |
| 800                            | 0.13    | 0.04   |
| 1600                           | 0.07    | 0.03   |
| 3200                           | 0.09    | 0.04   |
| 6400                           | 0.12    | 0.05   |

**Table S11.** Iron concentrations (n=3) measured in the pore water of Lufa 2.2 soil spiked with FeCl<sub>3</sub> expressed as mg Fe/l, at start (T=0 days) and end (T=28 days) of test. Detection limit = 0.012.

| Nominal<br>(mg Fe/kg dry soil) | mg Fe/l |        |
|--------------------------------|---------|--------|
|                                | T = 0   | T = 28 |
| Control                        | 0.11    | 0.05   |
| 400                            | 0.06    | 0.04   |
| 800                            | 8.02    | 2.82   |
| 1600                           | 129     | 109    |

**Table S12.** Copper concentrations (n=3) measured in the pore water of Lufa 2.2 soil spiked with CuO nanomaterial (NM) expressed as mg Cu/l, at start (T=0 days) and end (T=28 days) of test. Detection limit = 0.003.

| Nominal<br>(mg Cu/kg dry soil) | mg Cu/l |        |
|--------------------------------|---------|--------|
|                                | T = 0   | T = 28 |
| Control                        | 0.01    | 0.02   |
| 6400                           | 2.31    | 0.41   |

**Table S13.** Copper concentrations (n=3) measured in the pore water of Lufa 2.2 soil spiked with CuCl<sub>2</sub> expressed as mg Cu/l, at start (T=0 days) and end (T=28 days) of test. Detection limit = 0.003.

| Nominal<br>(mg Cu/kg dry soil) | mg Cu/l |        |
|--------------------------------|---------|--------|
|                                | T = 0   | T = 28 |
| Control                        | 0.06    | 0.02   |
| 400                            | 0.15    | 0.18   |
| 800                            | 3.74    | 1.13   |
| 1600                           | 17.05   | 10.78  |

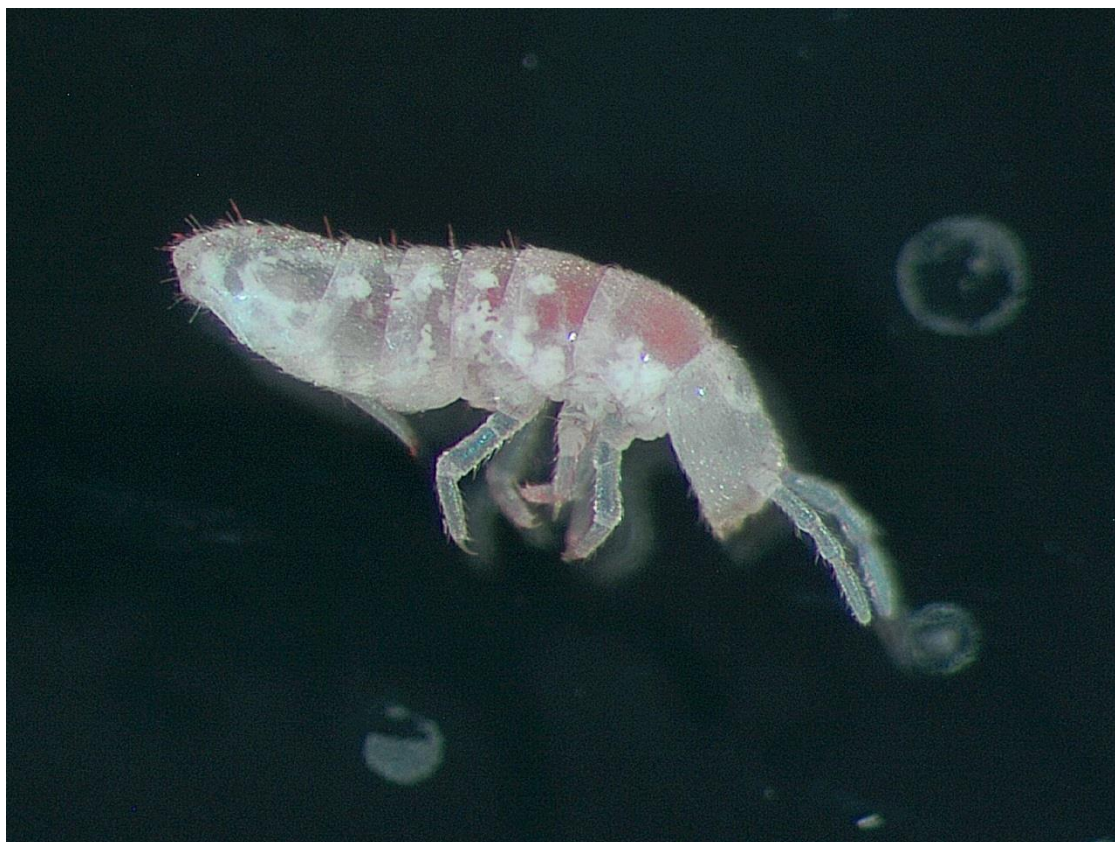

**Figure S1.** Picture of a snapfrozen (with liquid nitrogen) *Folsomia candida* after 28 days of exposure to organic pigment (OP) nanomaterials. The picture shows that the compound is present in the animal's midgut. Picture taken by Jeroen Noordhoek.
